# Supplementary material for: Diagnostic Application of Targeted Next-Generation Sequencing of 80 Genes Associated with Disorders of Sexual Development
Source: PubMed Central journal article supplement (PMC5353765; doi:10.1038/srep44536), 2017-03-15
Supplement: srep44536-s1.pdf [file srep44536-s1.pdf]

## Supplementary Information

### **Diagnostic Application of Targeted Next-Generation Sequencing of 80 Genes Associated with Disorders of Sexual Development**

Yanjie Fan<sup>1</sup>, Xia Zhang<sup>1</sup>, Lili Wang<sup>1</sup>, Ruifang Wang<sup>1</sup>, Zhuo Huang<sup>1</sup>, Yu Sun<sup>1</sup>, Ruen Yao<sup>2</sup>, Xiaodong Huang<sup>2</sup>, Jun Ye<sup>1</sup>, Lianshu Han<sup>1</sup>, Wenjuan Qiu<sup>1</sup>, Huiwen Zhang<sup>1</sup>, Lili Liang<sup>1</sup>, Xuefan Gu<sup>1,\*</sup>, Yongguo Yu<sup>1,\*</sup>

<sup>1</sup>Department of Pediatric Endocrinology/Genetics, Xinhua Hospital, Shanghai Jiao Tong University School of Medicine, Shanghai Institute for Pediatric Research, Shanghai, 200092, China.

<sup>2</sup>Department of Endocrinology, Shanghai Children's Medical Center, Shanghai Jiao Tong University School of Medicine, Shanghai, 200127, China.

**Supplementary Table 1. Key QC metrics of next-generation sequencing**

| <b>ID</b>   | <b>TOTAL_READS</b> | <b>PCT_PF_READS_ALIGNED</b> | <b>MEAN_COVERAGE</b> | <b>&gt;1X coverage</b> | <b>&gt;10X coverage</b> |
|-------------|--------------------|-----------------------------|----------------------|------------------------|-------------------------|
| P01         | 216731             | 0.994                       | 168.750              | 0.982                  | 0.968                   |
| P02         | 365649             | 0.991                       | 272.555              | 0.985                  | 0.970                   |
| P03         | 186557             | 0.977                       | 131.517              | 0.982                  | 0.963                   |
| P04         | 217867             | 0.973                       | 146.824              | 0.977                  | 0.946                   |
| P05         | 214946             | 0.994                       | 178.877              | 0.985                  | 0.964                   |
| P06         | 275664             | 0.992                       | 179.121              | 0.977                  | 0.894                   |
| P07         | 214215             | 0.987                       | 158.431              | 0.979                  | 0.961                   |
| P08         | 233177             | 0.985                       | 169.185              | 0.977                  | 0.959                   |
| P09         | 258010             | 0.987                       | 197.076              | 0.980                  | 0.960                   |
| P10         | 209280             | 0.956                       | 145.465              | 0.982                  | 0.961                   |
| P11         | 193041             | 0.960                       | 134.071              | 0.980                  | 0.948                   |
| P12         | 245334             | 0.967                       | 178.467              | 0.979                  | 0.962                   |
| P13         | 220286             | 0.976                       | 169.258              | 0.979                  | 0.955                   |
| P14         | 210836             | 0.980                       | 162.337              | 0.983                  | 0.968                   |
| P15         | 216663             | 0.976                       | 157.427              | 0.982                  | 0.960                   |
| P16         | 233807             | 0.993                       | 182.423              | 0.976                  | 0.930                   |
| P17         | 338526             | 0.991                       | 256.028              | 0.976                  | 0.951                   |
| P18         | 257480             | 0.997                       | 210.989              | 0.960                  | 0.912                   |
| P19         | 381739             | 1.000                       | 318.812              | 0.968                  | 0.930                   |
| P20         | 154158             | 0.997                       | 127.350              | 0.970                  | 0.820                   |
| P21         | 171815             | 0.987                       | 129.775              | 0.974                  | 0.943                   |
| P22         | 169294             | 1.000                       | 130.669              | 0.977                  | 0.947                   |
| P23         | 260135             | 1.000                       | 196.421              | 0.979                  | 0.956                   |
| P24         | 250136             | 1.000                       | 170.222              | 0.971                  | 0.873                   |
| P25         | 321739             | 0.992                       | 237.911              | 0.980                  | 0.944                   |
| P26         | 224597             | 0.983                       | 160.281              | 0.979                  | 0.957                   |
| P27         | 257672             | 0.984                       | 186.105              | 0.980                  | 0.958                   |
| P28         | 297715             | 0.985                       | 235.445              | 0.982                  | 0.974                   |
| P29         | 199373             | 0.986                       | 156.715              | 0.982                  | 0.968                   |
| P30         | 341899             | 0.992                       | 280.182              | 0.982                  | 0.969                   |
| P31         | 282595             | 0.995                       | 226.562              | 0.983                  | 0.968                   |
| P32         | 197209             | 0.989                       | 152.394              | 0.980                  | 0.957                   |
| <b>Mean</b> | <b>244317</b>      | <b>0.986</b>                | <b>184.614</b>       | <b>0.978</b>           | <b>0.947</b>            |

**Supplementary Figure S1. The overlap of the sequenced genes in our study with those in another 2 similar studies**

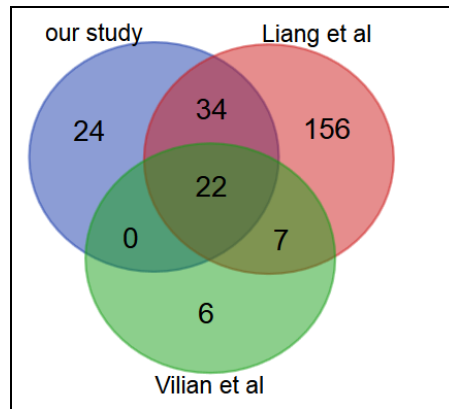

| Names                              | total | elements                                                                                                                                                                                                                                                                                                                                                                                                                                                                                                                                                                                                                                                                                                                                                                                                                                                                                                                               |
|------------------------------------|-------|----------------------------------------------------------------------------------------------------------------------------------------------------------------------------------------------------------------------------------------------------------------------------------------------------------------------------------------------------------------------------------------------------------------------------------------------------------------------------------------------------------------------------------------------------------------------------------------------------------------------------------------------------------------------------------------------------------------------------------------------------------------------------------------------------------------------------------------------------------------------------------------------------------------------------------------|
| Liang et al Vilian et al our study | 22    | ATRX DMRT1 CYP11A1 WT1 SOX9 POR STAR LHCGR SOX3 NR0B1 AR FGFR2 MAP3K1 RSP01 DHH CBX2 GATA4 SRD5A2 MAMLD1 NR5A1 SRY WNT4                                                                                                                                                                                                                                                                                                                                                                                                                                                                                                                                                                                                                                                                                                                                                                                                                |
| Liang et al our study              | 34    | BMP4 SEMA3A TACR3 HS6ST1 CUL4B CYB5A HSD3B2 KISS1 HSD17B4 POLR3A PROKR2 PAX2 GNRH1 HDAC8 FGFR1 WDR11 AKR1C4 GNRHR FGF8 LEP PSMC3IP SOX10 KAL1 LHB TAC3 HSD17B3 CHD7 PROK2 AKR1C2 MID1 SOX2 KISS1R FSHR BMP15                                                                                                                                                                                                                                                                                                                                                                                                                                                                                                                                                                                                                                                                                                                           |
| Liang et al Vilian et al           | 7     | CYP17A1 INSL3 FOXL2 AMH ARX TSPYL1 DMRT2                                                                                                                                                                                                                                                                                                                                                                                                                                                                                                                                                                                                                                                                                                                                                                                                                                                                                               |
| our study                          | 24    | FLRT3 HESX1 LHFPL5 NMT2 NLGN4X TUBB3 PROP1 NELF BNC2 AKR1C1 IL17RD WWOX ESR2 DUSP6 HOXB6 LHX9 AKAP2 HOXA4 SPRY4 ATF3 BMP7 LHX3 FGF17 TDRD7                                                                                                                                                                                                                                                                                                                                                                                                                                                                                                                                                                                                                                                                                                                                                                                             |
| Liang et al                        | 156   | SMS ERCC8 FSHB DDX3Y KDM5D RAB3GAP2 EIF2B5 LEPR BSCL2 DMRT3 OPHN1 EIF2B3 AGPAT2 SEMA3E ALMS1 INPP5E WNT7A KLHL4 HFE UPK3A NBN TTC8 H6PD CYP19A1 UBR1 IGSF1 BBS4 SOS1 LMNA CD96 BRWD3 PITX2 ORC1 PEX5 PEX3 FRAS1 BBS2 MKS1 EIF1AY SLC39A4 PEX12 STK11 KIF7 DHCR7 INSR GPC6 RAF1 MTM1 GLI3 RECQL4 PMM2 PEX2 POLG BRCC3 EIF2B4 TSHR BLM RAB23 CREBBP ATR PCSK1 HPRT1 GK EVC ZBTB16 CUL7 HOXA13 FMR1 EIF2B1 POF1B BBS9 TBX3 ARID1B ALX4 WNT3 PEX6 OFD1 IRX5 WDPCP PRKAR1A FGD1 PCDH11Y KRAS DIAPH2 MBTPS2 BBS1 BRAF MECP2 FLNA PAPSS2 NSMF BBS10 CEP290 USP26 TBCE FREM2 USP9Y IRF6 BBS12 AMHR2 OCRL PHF6 TRIM32 STRA6 EIF2B2 WNT5A PEX1 FIGLA PTPN11 RET KDM5C HOXD13 PEX26 SLC29A3 MED12 MLL2 CYP11B1 CFTR GNAS TP63 NRAS MTCP1 GHR NSDHL MAP2K1 MKKS BBS7 PEX14 RIPK4 HCCS GATA1 BMPR1B CHRM3 EBP NAA10 BUB1B SF3B4 HARS2 SMARCA2 ROR2 ICK DCAF17 NOBOX NOTCH2 ARL6 DOCK8 DGKK NR3C1 RXFP2 RAB40AL EVC2 AIRE CDKN1C TMEM67 BBS5 HSD11B1 |
| Vilian et al                       | 6     | CYP21A2 ZFPM2 AMHR 17BHS03 3BHSD2 FGF9                                                                                                                                                                                                                                                                                                                                                                                                                                                                                                                                                                                                                                                                                                                                                                                                                                                                                                 |

**References:**

Dong Y, Yi Y, Hong Y, et al. Targeted next-generation sequencing identification of mutations in patients with disorders of sex development[J]. *Bmc Medical Genetics*, 2016, 17(1):1-9.

Arboleda V A, Lee H, Sánchez F J, et al. Targeted massively parallel sequencing provides comprehensive genetic diagnosis for patients with disorders of sex development[J]. *Clinical Genetics*, 2013, 83(1):35-43.)
